# Supplementary material for: Prevention of Musculoskeletal Diseases and Pain among Dental Professionals through Ergonomic Interventions: A Systematic Literature Review
Source: MDPI journal article supplement (doi:10.3390/ijerph17103482), 2020-05-16
Supplement: s1 [file s1]

## Appendix\_S2

| Number | Criterion                | Item                                                                                                                         | Answer option                |
|--------|--------------------------|------------------------------------------------------------------------------------------------------------------------------|------------------------------|
| 1      | Reporting                | Is the hypothesis/aim/objective of the study clearly described?                                                              | Yes; no                      |
| 2      |                          | Are the main outcomes clearly described in the Introduction or Methods section?                                              | Yes; no                      |
| 3      |                          | Are the characteristics of the subjects included in the study clearly described?                                             | Yes; no                      |
| 4      |                          | Are the interventions clearly described?                                                                                     | Yes; no                      |
| 5      |                          | Are the distributions of principal confounders clearly described?                                                            | Yes; partially; no           |
| 6      |                          | Are the main findings of the study clearly described?                                                                        | Yes; no                      |
| 7      |                          | Does the study provide estimates of the random variability in the data for the main findings?                                | Yes; no                      |
| 8      |                          | Have all important adverse events that may be a consequence of the intervention been reported?                               | Yes; no                      |
| 9      |                          | Have the characteristics of subjects lost to follow-up been described?                                                       | Yes; no                      |
| 10     |                          | Have (actual) probability values been reported for the main findings?                                                        | Yes; no                      |
| 11     | External validity        | Were the subjects asked to participate in the study representative of the entire population from which they were recruited?  | Yes; no; unable to determine |
| 12     |                          | Were those subjects who were prepared to participate representative of the entire population from which they were recruited? | Yes; no; unable to determine |
| 13     |                          | Were the staff, places and facilities representative?                                                                        | Yes; no; unable to determine |
| 14     | Internal validity - bias | Was an attempt made to blind subjects to the intervention?                                                                   | Yes; no; unable to determine |
| 15     |                          | Was an attempt made to blind study managers?                                                                                 | Yes; no; unable to determine |
| 16     |                          | If applicable, was „data dredging” made clear?                                                                               | Yes; no; unable to determine |
| 17     |                          | Do the analyses adjust for different lengths of follow-up of subjects?                                                       | Yes; no; unable to determine |
| 18     |                          | Were the statistical tests used to assess the main outcomes appropriate?                                                     | Yes; no; unable to determine |
| 19     |                          | Was compliance with the intervention reliable?                                                                               | Yes; no; unable to determine |
| 20     |                          | Were the main outcome measures used valid and reliable?                                                                      | Yes; no; unable to determine |

|    |                                 |                                                                                                                                            |                              |
|----|---------------------------------|--------------------------------------------------------------------------------------------------------------------------------------------|------------------------------|
| 21 | Internal validity - confounding | Were the subjects in different intervention/control groups recruited from the same population?                                             | Yes; no; unable to determine |
| 22 |                                 | Were the subjects in different intervention/control groups recruited over the same period of time?                                         | Yes; no; unable to determine |
| 23 |                                 | Were the subjects randomized to intervention groups?                                                                                       | Yes; no; unable to determine |
| 24 |                                 | Was the randomized intervention assignment concealed from both subjects and study managers until recruitment was complete and irrevocable? | Yes; no; unable to determine |
| 25 |                                 | Was there adequate adjustment for confounding in the analyses of the main findings?                                                        | Yes; no; unable to determine |
| 26 |                                 | Were losses of subjects to follow-up taken into account?                                                                                   | Yes; no; unable to determine |
| 27 | Power                           | Did the study have sufficient power to detect a clinically important effect?                                                               | 0-5 points range             |
|    |                                 |                                                                                                                                            | <b>Σ 32 points</b>           |

Classification of study quality defined by the authors: 0-10 points = low quality; 11-21 points = moderate quality; 22-32 points = high quality.

Reference: Downs & Black (1998): The feasibility of creating a checklist for the assessment of the methodological quality both of randomized and non-randomized studies of health care interventions. J Epidemiol Community Health 52; 377-384.
