# Supplementary material for: Prevention of Musculoskeletal Diseases and Pain among Dental Professionals through Ergonomic Interventions: A Systematic Literature Review
Source: MDPI journal article supplement (doi:10.3390/ijerph17103482), 2020-05-16
Supplement: s1 [file s1]

## Appendix\_S1

- 1 Dent\*
- 2 Dental personnel/ professionals
- 3 Oral health
- 4 1 OR 2 OR 3
- 5 Ergonomics/ human engineering
- 6 Intervention
- 7 (Primary) prevention
- 8 5 OR 6 OR 7
- 9 Musculoskeletal diseases
- 10 Musculoskeletal pain
- 11 9 OR 10
- 12 4 AND 8 AND 11
- 13 Limit 12 to yr="2008-current"
- 14 Limit 13 to lang="English"
- 15 Limit 14 to "abstract available"
- 16 Limit 15 to "humans"
